# Supplementary material for: The Mutation Spectrum of Rare Variants in the Gene of Adenosine Triphosphate (ATP)-Binding Cassette Subfamily C Member 8 in Patients with a MODY Phenotype in Western Siberia
Source: MDPI journal article supplement (doi:10.3390/jpm13020172), 2023-01-19
Supplement: s1 [file s1]

**Table S1.** The genetic variants identified in Western Siberia patients with a phenotype of maturity onset diabetes of the young (MODY) and new variants.

| Patient ID, gender  | Gene       | Variant status | Nucleotide changes* | Amino acid changes    | Location      | Genotype            | Minor allele frequency (gnomAD) | dbSNP ID     | ClinVar variation ID | HGMD      | Pathogenicity according to ACMG [24], evidence | LOVD Database ID | Segregation with phenotype in family |
|---------------------|------------|----------------|---------------------|-----------------------|---------------|---------------------|---------------------------------|--------------|----------------------|-----------|------------------------------------------------|------------------|--------------------------------------|
| <b>P437, Female</b> | <b>GCK</b> | <b>Novel</b>   | <b>c.11_12del</b>   | <b>p.Asp4Glufs*47</b> | <b>Exon 1</b> | <b>Heterozygous</b> | <b>NA</b>                       | <b>NA</b>    | <b>NA</b>            | <b>NA</b> | <b>Pathogenic, PM2, PVS1, PP3, PP1</b>         | <b>NA</b>        | <b>Yes</b>                           |
| P6, Female          | GCK        | Known          | c.106C>T            | p.Arg36Trp            | Exon 2        | Heterozygous        | 0.000014                        | rs762263694  | 431973               | CM940823  | PR                                             | GCK_000007       | Yes                                  |
| P50, Male           |            |                |                     |                       |               | Heterozygous        |                                 |              |                      |           |                                                |                  | Yes                                  |
| P59, Female         | GCK        | Known          | c.110T>C            | p.Met37Thr            | Exon 2        | Heterozygous        | NA                              | NA           | NA                   | NA        | PR                                             | GCK_000100       | Yes                                  |
| P17, Female         | GCK        | Known          | c.130G>A            | p.Gly44Ser            | Exon 2        | Heterozygous        | NA                              | rs267601516  | 76898                | CM013265  | PR                                             | GCK_000029       | Yes                                  |
| P403, Male          | GCK        | Known          | c.208G>A            | p.Glu70Lys            | Exon 2        | Heterozygous        | NA                              | NA           | NA                   | CM930294  | PR                                             | NA               | Yes                                  |
| P74, Female         | GCK        | Known          | c.238G>A            | p.Gly80Ser            | Exon 3        | Heterozygous        | NA                              | rs1554335761 | 449415               | CM970630  | PR                                             | NA               | Yes                                  |
| P412, Female        |            |                |                     |                       |               | Heterozygous        |                                 |              |                      |           |                                                |                  | Yes                                  |
| P398, Female        |            |                |                     |                       |               | Heterozygous        |                                 |              |                      |           |                                                |                  | Yes                                  |
| <b>P51, Male</b>    | <b>GCK</b> | <b>Novel</b>   | <b>c.424A&gt;T</b>  | <b>p.Lys142*</b>      | <b>Exon 4</b> | <b>Heterozygous</b> | <b>NA</b>                       | <b>NA</b>    | <b>NA</b>            | <b>NA</b> | <b>Pathogenic, PVS1, PM2, PM1, PP1</b>         | <b>NA</b>        | <b>Yes</b>                           |
| <b>P4, Male</b>     | <b>GCK</b> | <b>Novel</b>   | <b>c.436C&gt;G</b>  | <b>p. Leu146Val</b>   | <b>Exon 4</b> | <b>Heterozygous</b> | <b>NA</b>                       | <b>NA</b>    | <b>NA</b>            | <b>NA</b> | <b>Pathogenic, PS1, PS3, PM2, PP1</b>          | <b>NA</b>        | <b>Yes</b>                           |
| P10, Male           | GCK        | Known          | c.449T>A            | p. Phe150Tyr          | Exon 4        | Heterozygous        | NA                              | rs193922297  | 129142               | CM097114  | PR                                             | NA               | Yes                                  |

|                 |     |       |              |                  |          |              |          |              |        |          |                                           |            |     |
|-----------------|-----|-------|--------------|------------------|----------|--------------|----------|--------------|--------|----------|-------------------------------------------|------------|-----|
| P86,<br>Female  | GCK | Novel | c.517_520del | p.Ala173Glnfs*30 | Exon 5   | Heterozygous | NA       | NA           | NA     | NA       | Pathogenic, PVS1, PS1, PM2, PM4, PP1, PP3 | NA         | Yes |
| P90,<br>Male    | GCK | Known | c.517 G>A    | p.Ala173Thr      | Exon 5   | Heterozygous | NA       | NA           | NA     | NA       | Pathogenic, PS1, PM2, PM5, PP1, PP3       | GCK_000217 | Yes |
| P80,<br>Female  | GCK | Novel | c.542T>A     | p.Val181Asp      | Exon 5   | Heterozygous | NA       | NA           | NA     | NA       | Pathogenic, PS1, PM2, PM5, PP1, PP3       | NA         | Yes |
| P46,<br>Female  |     |       |              |                  |          | Heterozygous |          |              |        |          |                                           |            | Yes |
| P428,<br>Female | GCK | Known | c.556C>T     | p.Arg186*        | Exon 5   | Heterozygous | NA       | rs104894006  | 16133  | CM920304 | PR                                        | GCK_000060 | Yes |
| P453,<br>Male   | GCK | Known | c.562G>A     | p.Ala188Thr      | Exon 5   | Heterozygous | 0.000004 | rs751279776  | 804849 | CM930299 | PR                                        | GCK_000110 | Yes |
| P14,<br>Female  | GCK | Known | c.580-1G>A   | -                | Intron 5 | Heterozygous | NA       | rs1554335421 | 449414 | CS052048 | PR                                        | NA         | Yes |
| P384,<br>Female | GCK | Known | c.659G>A     | p.Cys220Tyr      | Exon 6   | Heterozygous | NA       | rs193922316  | 36240  | CM121473 | PR                                        | GCK_000161 | Yes |
| P30,<br>Female  | GCK | Known | c.660C>A     | p.Cys220*        | Exon 6   | Heterozygous | NA       | NA           | NA     | CM020443 | PR                                        | NA         | Yes |
| P433,<br>Female | GCK | Known | c.683C>T     | p.Thr228Met      | Exon 7   | Heterozygous | 0.000004 | rs80356655   | 16134  | CM920305 | PR                                        | GCK_000236 | Yes |
| P68,<br>Female  | GCK | Known | c.700 T>C    | p.Tyr234His      | Exon 7   | Heterozygous | NA       | NA           | NA     | CM096864 | PR                                        | NA         | Yes |
| P40,<br>Female  | GCK | Known | c.752T>C     | p. Met251Thr     | Exon 7   | Heterozygous | NA       | rs193922326  | 36251  | CM096876 | PR                                        | NA         | Yes |
| P67,<br>Male    | GCK | Known | c.755 G>A    | p.Cys252Tyr      | Exon 7   | Heterozygous | NA       | NA           | NA     | CM021266 | PR                                        | NA         | NA  |
| P83,<br>Male    | GCK | Known | c.771 G>A    | p.Trp257*        | Exon7    | Heterozygous | NA       | NA           | NA     | NA       | Reported in [30]                          | NA         | NA  |
| P3,<br>Male     | GCK | Known | c.772G>T     | p.Gly258Cys      | Exon 7   | Heterozygous | NA       | rs1583596378 | 804857 | CM032578 | PR                                        | NA         | NA  |

|                 |           |       |             |                      |          |                  |           |              |        |          |                                                        |              |     |
|-----------------|-----------|-------|-------------|----------------------|----------|------------------|-----------|--------------|--------|----------|--------------------------------------------------------|--------------|-----|
| P77,<br>Female  |           |       |             |                      |          |                  |           |              |        |          |                                                        |              | Yes |
| P374,<br>Female | GCK       |       |             |                      |          |                  |           |              |        |          |                                                        |              | Yes |
| P377,<br>Female | GCK       |       |             |                      |          |                  |           |              |        |          |                                                        |              | Yes |
| P88,<br>Female  | GCK       | Novel | c.782 G>C   | p.Gly261Ala          | Exon 7   | Heterozygou<br>s | NA        | NA           | NA     | NA       | Pathogenic,<br>PS1, PM2,<br>PM5, PP3                   | NA           | NA  |
| P54,<br>Male    | GCK       | Novel | c.864 -1G>T | -                    | Intron 7 | Heterozygou<br>s | NA        | NA           | NA     | NA       | Pathogenic,<br>PVS1, PM2,<br>PP1, PP3                  | NA           | Yes |
| P57,<br>Male    | GCK       | Novel | c.1113C>A   | p.Cys371*            | Exon 9   | Heterozygou<br>s | NA        | NA           | NA     | NA       | Pathogenic,<br>PVS1, PS1,<br>PM1, PM2,<br>PM5, PP1     | NA           | Yes |
| P70,<br>Female  | GCK       | Known | c.1120G>A   | p.Val374Met          | Exon 9   | Heterozygou<br>s | NA        | rs1415041911 | 447380 | CM096927 | PR                                                     | NA           | Yes |
| P61,<br>Female  | GCK       | Known | c.1148C>A   | p.Ser383*            | Exon 9   | Heterozygou<br>s | 0.0000042 | rs777870079  | NA     | CM032579 | PR                                                     | NA           | Yes |
| P87,<br>Male    | GCK       | Novel | c.1327 G>A  | p.Glu443Lys          | Exon 10  | Heterozygou<br>s | NA        | NA           | NA     | NA       | Likely<br>pathogenic,<br>PM1, PM2,<br>PP2, PP3         | NA           | NA  |
| P19,<br>Female  | HNF<br>1A | Novel | c.18C>G     | p.Ser6Arg            | Exon 1   | Heterozygou<br>s | NA        | NA           | NA     | NA       | Likely<br>pathogenic,<br>PS4, PM2,<br>PP1, PP2,<br>PP3 | NA           | Yes |
| P11,<br>Female  | HNF<br>1A | Known | c.185A>G    | p.Asn62Ser           | Exon 1   | Heterozygou<br>s | 0.00012   | rs377129682  | 447485 | CM064300 | PR                                                     | HNF1A_000235 | NA  |
| P376,<br>Female | HNF<br>1A | Novel | c.335delA   | p.Pro112Argfs<br>*43 | Exon 2   | Heterozygou<br>s | NA        | NA           | NA     | NA       | Pathogenic,<br>PM2, PVS1,<br>PP3, PP1                  | NA           | Yes |

|                        |                   |              |                             |                                |                 |                          |           |              |             |               |                                                          |              |            |
|------------------------|-------------------|--------------|-----------------------------|--------------------------------|-----------------|--------------------------|-----------|--------------|-------------|---------------|----------------------------------------------------------|--------------|------------|
| <b>P34,<br/>Female</b> | <b>HNF<br/>1A</b> | <b>Novel</b> | <b>c.526 +1 G&gt;T</b>      | <b>-</b>                       | <b>Intron 2</b> | <b>Heterozygou<br/>s</b> | <b>NA</b> | <b>NA</b>    | <b>NA</b>   | <b>NA</b>     | <b>Pathogenic,<br/>PVS1, PM2,<br/>PP1, PP2,<br/>PP3</b>  | <b>NA</b>    | <b>Yes</b> |
| P65,<br>Female         | HNF<br>1A         | Known        | c.608G>A                    | p.Arg203His                    | Exon 3          | Heterozygou<br>s         | 0.000008  | rs587780357  | 129235      | CM993816      | PR                                                       | HNF1A_000137 | Yes        |
| <b>P91,<br/>Female</b> | <b>HNF<br/>1A</b> | <b>Novel</b> | <b>c.713G&gt;A</b>          | <b>p.Arg238Lys</b>             | <b>Exon 3</b>   | <b>Heterozygou<br/>s</b> | <b>NA</b> | <b>NA</b>    | <b>NA</b>   | <b>NA</b>     | <b>Likely<br/>pathogenic,<br/>PS1, PM2,<br/>PP2, PP3</b> | <b>NA</b>    | <b>NA</b>  |
| <b>P78,<br/>Male</b>   | <b>HNF<br/>1A</b> | <b>Novel</b> | <b>c.713 +2 T&gt;A</b>      | <b>-</b>                       | <b>Intron 3</b> | <b>Heterozygou<br/>s</b> | <b>NA</b> | <b>NA</b>    | <b>NA</b>   | <b>NA</b>     | <b>Pathogenic,<br/>PVS1, PM2,<br/>PP1, PP2,<br/>PP3</b>  | <b>NA</b>    | <b>Yes</b> |
| P82,<br>Female         | HNF<br>1A         | Known        | c.779C>T                    | p.Thr260Met                    | Exon 4          | Heterozygou<br>s         | 0.0000040 | rs886039544  | 265436      | CM971457      | PR                                                       | HNF1A_000148 | NA         |
| P408,<br>Female        | HNF<br>1A         | Known        | c.872dupC                   | p.Gly292Argfs<br>*25           | Exon 4          | Heterozygou<br>s         | NA        | rs587776825  | 14927       | CI962354      | PR                                                       | HNF1A_000160 | Yes        |
| P297,<br>Female        | HNF<br>1A         | Known        | c.872delC                   | p.Pro291Glnfs<br>*51           | Exon 4          | Heterozygou<br>s         | NA        | rs587776825  | 805637      | CD972459      | PR                                                       | HNF1A_000161 | Yes        |
| P16,<br>Female         | HNF<br>1A         | Known        | c.1522G > A                 | p.Glu508Lys                    | Exon 6          | Heterozygou<br>s         | 0.00044   | rs483353044  | 135665      | CM082841      | PR                                                       | HNF1A_000214 | NA         |
| P81,<br>Male           | HNF<br>1A         | Known        | c.1768G>A                   | p.Val590Met                    | Exon 9          | Heterozygou<br>s         | 0.0000042 | rs1168108747 | 447484      | NA            | Uncertain<br>significance,<br>PM2, PP1,<br>PP2, PP3,     | NA           | Yes        |
| P73,<br>Male           | HNF<br>1A         | Known        | c.160C>T                    | p.Arg54*                       | Exon 1          | Heterozygou<br>s         | 0.0000042 | rs766956862  | 805632      | CM032035      | PR                                                       | HNF1A_000220 | Yes        |
|                        | ABC<br>C8         | Known        | c.1562G>A                   | p.Arg521Gln                    | Exon 10         | Heterozygou<br>s         | 0.000095  | rs368114790  | 157683      | CM121213<br>8 | PR                                                       | ABCC8_000172 |            |
| P293,<br>Female        | ABC<br>C8         | Known        | c.970G>A                    | p.Val324Met                    | Exon 6          | Heterozygou<br>s         | NA        | rs1328072266 | 133834<br>2 | CM073986      | PR                                                       | NA           | Yes        |
| <b>P330,<br/>Male</b>  | <b>ABC<br/>C8</b> | <b>Novel</b> | <b>c.4609_4610ins<br/>C</b> | <b>p.His1537Prof<br/>s*r22</b> | <b>Exon 39</b>  | <b>Heterozygou<br/>s</b> | <b>NA</b> | <b>NA</b>    | <b>NA</b>   | <b>NA</b>     | <b>Pathogenic,<br/>PM2, PVS1,<br/>PP3, PP1</b>           | <b>NA</b>    | <b>NA</b>  |

|                         |                     |              |                 |                        |               |                     |           |             |           |           |                                            |              |           |
|-------------------------|---------------------|--------------|-----------------|------------------------|---------------|---------------------|-----------|-------------|-----------|-----------|--------------------------------------------|--------------|-----------|
| P12,<br>Male            | <i>ABCC8</i>        | Known        | c.4369G>C       | p.Ala1457Thr           | Exon 36       | Heterozygous        | NA        | rs72559717  | NA        | CM011260  | PR                                         | NA           | Yes       |
| P27,<br>Female          | <i>HNF1B</i>        | Known        | c.1006C>G       | p.His336Asp            | Exon 4        | Heterozygous        | 0.0002    | rs138986885 | 595653    | CM067046  | PR                                         | HNF1B_000125 | No        |
| P400,<br>Female         |                     |              |                 |                        |               | Heterozygous        |           |             |           |           |                                            |              | NA        |
| <b>P381,<br/>Female</b> | <b><i>HNF4A</i></b> | <b>Novel</b> | <b>c.85delC</b> | <b>p.Asn30Thrfs*74</b> | <b>Exon 3</b> | <b>Heterozygous</b> | <b>NA</b> | <b>NA</b>   | <b>NA</b> | <b>NA</b> | <b>Pathogenic,<br/>PM2, PVS1,<br/>PP3.</b> | <b>NA</b>    | <b>NA</b> |

\* RefSeq reference transcript: *GCK* (NM\_000162.5), *ABCC8* (NM\_000352.3), *HNF1B* (NM\_000458.2), and *HNF1A* (NM\_000545.6), *HNF4A* (NM\_175914.5). HGMD: Human Genome Mutation Database; LOVD database: Leiden Open Variation Database; NA: not available; PR: previously reported to be associated with a pathological phenotype (in the literature, in LOVD, ClinVar, or HGMD) and was not classified according to ACMG recommendations. Variants identified for the first time are boldfaced.
